# Supplementary material for: Top-down estimate of black carbon emissions for city clusters using ground observations: a case study in southern Jiangsu, China
Source: Copernicus journal article supplement (doi:10.5194/acp-19-2095-2019), 2019-02-18
Supplement: Supplementary file 1 [file acp-19-2095-2019-supplement.pdf]

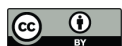

*Supplement of*

## **Top-down estimate of black carbon emissions for city clusters using ground observations: a case study in southern Jiangsu, China**

**Xuefen Zhao et al.**

*Correspondence to:* Yu Zhao ([yuzhao@nju.edu.cn](mailto:yuzhao@nju.edu.cn))

The copyright of individual parts of the supplement might differ from the CC BY 4.0 License.

**Number of tables: 10    Number of figures: 16**

### **Table list**

Table S1. Data sources of activity levels and scaling factors for BC emissions from 2012 to 2015 by source category in southern Jiangsu.

Table S2. Reduction rates in monthly emissions from 2012 to 2015 in MEIC for southern Jiangsu and other regions within the third modeling domain (unit: %).

Table S3. Reduction rates in annual PM<sub>2.5</sub> concentration for cities within the third modeling domain from 2013 to 2015 (unit: %).

Table S4. Statistic indicators of meteorological parameters at three stations in the third modeling domain for January (a), April (b), July (c) and October (d) in 2015.

Table S5. The monthly and annual contributions of industry, power generation, residential resources and transportation to ambient BC concentrations at NJU and PAES (unit: %).

Table S6. Statistical indicators for observed and simulated BC concentrations using JS-prior and JS-posterior in January excluding data from 16<sup>th</sup> to 26<sup>th</sup> at PAES.

Table S7. The simulated monthly average PBL heights and the range of hourly simulations at NJU and PAES in four months (unit: m).

Table S8. Statistical indicators for observed and simulated BC concentrations for all periods, those included in the multiple regression model, and those excluded from the model in JS-prior and Case 2 for April 2015 at NJU.

Table S9. BC emissions from Nanjing and Suzhou–Wuxi–Changzhou–Zhenjiang city cluster in different cases in April 2015 (unit: Gg).

Table S10. The monthly emissions, simulated wet depositions and the ratios of wet deposition to emissions at NJU (a), PAES (b) and southern Jiangsu (c) using JS-prior and JS-posterior, respectively.

### **Figure list**

Figure S1. The locations of Jiangsu and cities in southern Jiangsu. The black stars indicate the downtown areas for each city.

Figure S2. Observed BC concentrations at NJU (a) and PAES (b) in January, April, July, and October of 2015 (unit:  $\mu\text{g}/\text{m}^3$ ). The box plot indicates the median of observed concentration (square symbols), and the maximum, 95th, 75th, 50th, 25th, 5th percentiles and the minimum.

Figure S3. Spatial distributions of BC emissions by sector (unit: Mg) in JS-prior (a) and JS-posterior (b).

Figure S4. The simulated concentrations contributed by industry, power generation, residential sources and transportation at NJU for January (a), April (b), July (c) and October (d) in 2015 (unit:  $\mu\text{g}/\text{m}^3$ ).

Figure S5. The same as Figure S4 but at PAES.

Figure S6. The transport pathways of air masses sampled at NJU based on cluster analysis of back trajectories in HYSPLIT model in January (a), April (b), July (c) and October (d).

Figure S7. BC emissions by sector from the bottom-up method for Nanjing in 2012 and 2015 (unit: Gg).

Figure S8. The seasonal variation of BC emissions by source (a) and total emissions (b) in JS-prior, JS-posterior and MEIC-prior.

Figure S9. The simulated daily average PBL heights in January in 2015 at PAES (unit: m).

Figure S10. The contributions of emissions from Nanjing (a) and Suzhou–Wuxi–Changzhou–Zhenjiang city cluster (b) to ambient BC levels at NJU and PAES.

Figure S11. The correlation between the simulated BC concentrations with JS-prior and those with doubled (a and c) or halved emissions (b and d) in JS-prior in July (a and b) and October (c and d) at NJU.  $F_{emis.}$  and  $F_{conc.}$  indicate respectively the fraction of changed emissions and that of changed simulated monthly average concentrations between sensitivity and base simulation (JS-prior).  $\Delta E$  and  $\Delta C$  indicate the change in emissions and that in simulated monthly average concentrations, respectively.

Figure S12. The same as Figure S11 but at PAES. As can be seen in all the panels in Figures S11 and S12, the fraction of change in simulated monthly average

concentration ( $F_{conc.}$ ) was close to that of emission change ( $F_{emis.}$ ), i.e., the ratio of  $F_{emis.}$  to  $F_{conc.}$  was around 1.0, within a range of  $\pm 10\%$ . Similar ratio of change in emissions ( $\Delta E$ ) to that in simulated average concentration ( $\Delta C$ ) was obtained for each month and site as well.

Figure S13. The observed and simulated hourly precipitation at Lukou (a), Liyang (b) and Shanghai (c) for January of 2015 (unit: mm/hr).

Figure S14. The same as Figure S13 but for April of 2015.

Figure S15. The same as Figure S13 but for July of 2015.

Figure S16. The same as Figure S13 but for October of 2015.

## Tables

**Table S1. Data sources of activity levels and scaling factors for BC emissions from 2012 to 2015 by source category in southern Jiangsu.**

| Sector              | Subsector                   | Main sources of activity level                           | Scaling factor |
|---------------------|-----------------------------|----------------------------------------------------------|----------------|
| Power generation    |                             | Jiangsu Statistical Yearbook                             | 1.108          |
| Industry            | Iron and steel              |                                                          | 1.302          |
|                     | Nonmetal mineral production |                                                          | 1.074          |
|                     | Nonferrous metal smelting   | China and Jiangsu Statistical Yearbook; China Energy and | 0.690          |
|                     | Oil refinery                | Industry Statistical Yearbook                            | 1.089          |
|                     | Chemical industry           |                                                          | 1.107          |
|                     | Glass                       |                                                          | 0.716          |
|                     | Other industry              |                                                          | 1.020          |
| Residential sources | Fossil fuel combustion      | Jiangsu Energy Statistical Yearbook; Jiangsu Statistical | 1.106          |
|                     | Biofuel                     | Yearbook                                                 | 1.043          |
| Transportation      | On-road                     | Jiangsu Energy Statistical                               | 1.112          |
|                     | Off-road                    | Yearbook; Jiangsu Statistical Yearbook                   | 1.182          |

**Table S2. Reduction rates in monthly emissions from 2012 to 2015 in MEIC for southern Jiangsu and other regions within the third modeling domain (unit: %).**

| Region                       | Jan. | Apr. | Jul. | Oct. |
|------------------------------|------|------|------|------|
| Southern Jiangsu (%)         | 18   | 18   | 26   | 21   |
| Outside southern Jiangsu (%) | 12   | 16   | 21   | 15   |

**Table S3. Reduction rates in annual PM<sub>2.5</sub> concentration for cities within the third modeling domain from 2013 to 2015 (unit: %).**

| Province | City      | Reduction rate (%) |
|----------|-----------|--------------------|
| Anhui    | Hefei     | 15.26              |
|          | Nantong   | 15.90              |
|          | Taizhou   | 11.76              |
|          | Yangzhou  | 16.84              |
| Jiangsu  | Nanjing   | 15.58              |
|          | Suzhou    | 12.76              |
|          | Wuxi      | 10.45              |
|          | Changzhou | 12.31              |
|          | Zhenjiang | 12.80              |
| Shanghai | Shanghai  | 10.88              |

**Table S4. Statistic indicators of meteorological parameters at three stations in the third modeling domain for January (a), April (b), July (c) and October (d) in 2015.**

| Variable | Parameter         | Lukou  | Hongqiao | Liyang |
|----------|-------------------|--------|----------|--------|
| T2       | Average OBS (°C)  | 4.63   | 6.81     | 5.40   |
|          | Average SIM (°C)  | 5.28   | 5.89     | 5.70   |
|          | Bias (°C)         | 0.64   | -0.92    | 0.30   |
|          | NMB (%)           | 13.85  | -13.52   | 5.49   |
|          | NME (%)           | 30.23  | 20.13    | 22.34  |
|          | RMSE (°C)         | 1.78   | 1.80     | 1.61   |
|          | IOA               | 0.95   | 0.95     | 0.96   |
| RH2      | Average OBS (%)   | 74.14  | 66.99    | 70.97  |
|          | Average SIM (%)   | 73.24  | 75.52    | 71.63  |
|          | Bias (%)          | -0.90  | 8.63     | 0.66   |
|          | NMB (%)           | -1.21  | 12.90    | 0.92   |
|          | NME (%)           | 17.11  | 18.65    | 18.85  |
|          | RMSE (%)          | 16.89  | 15.78    | 17.49  |
|          | IOA               | 0.84   | 0.85     | 0.82   |
| WS10     | Average OBS (m/s) | 2.34   | 3.90     | 1.98   |
|          | Average SIM (m/s) | 3.20   | 3.68     | 3.47   |
|          | Bias (m/s)        | 0.86   | -0.22    | 1.49   |
|          | NMB (%)           | 36.94  | -5.62    | 75.50  |
|          | NME (%)           | 52.02  | 31.40    | 83.33  |
|          | RMSE (m/s)        | 1.50   | 1.52     | 2.02   |
|          | IOA               | 0.76   | 0.77     | 0.51   |
| WD10     | Average OBS (deg) | 159.39 | 201.94   | 175.17 |
|          | Average SIM (deg) | 162.71 | 190.50   | 172.29 |
|          | Bias (deg)        | 3.32   | -11.44   | -2.89  |
|          | NMB(%)            | 2.09   | -5.66    | -1.65  |
|          | NME(%)            | 27.73  | 27.94    | 36.27  |
|          | RMSE (deg)        | 85.02  | 116.00   | 116.03 |
|          | IOA               | 0.85   | 0.78     | 0.76   |

(a)



| Variable | Parameter         | Lukou  | Hongqiao | Liyang |
|----------|-------------------|--------|----------|--------|
| T2       | Average OBS (°C)  | 15.54  | 16.51    | 16.05  |
|          | Average SIM (°C)  | 15.05  | 14.99    | 15.44  |
|          | Bias (°C)         | -0.49  | -1.53    | -0.59  |
|          | NMB (%)           | -3.19  | -9.30    | -3.68  |
|          | NME (%)           | 9.21   | 11.70    | 8.39   |
|          | RMSE (°C)         | 1.86   | 2.42     | 1.76   |
|          | IOA               | 0.97   | 0.95     | 0.98   |
| RH2      | Average OBS (%)   | 70.84  | 65.91    | 68.85  |
|          | Average SIM (%)   | 77.27  | 80.28    | 75.31  |
|          | Bias (%)          | 6.43   | 14.40    | 6.38   |
|          | NMB (%)           | 9.08   | 21.85    | 9.26   |
|          | NME (%)           | 16.66  | 23.07    | 19.07  |
|          | RMSE (%)          | 16.29  | 18.97    | 17.49  |
|          | IOA               | 0.85   | 0.79     | 0.82   |
| WS10     | Average OBS (m/s) | 2.88   | 4.13     | 2.46   |
|          | Average SIM (m/s) | 3.57   | 4.08     | 3.56   |
|          | Bias (m/s)        | 0.69   | -0.05    | 1.31   |
|          | NMB (%)           | 24.10  | -1.26    | 53.35  |
|          | NME (%)           | 42.71  | 23.93    | 65.83  |
|          | RMSE (m/s)        | 1.57   | 1.30     | 2.01   |
|          | IOA               | 0.81   | 0.87     | 0.68   |
| WD10     | Average OBS (deg) | 159.28 | 182.74   | 145.96 |
|          | Average SIM (deg) | 146.63 | 155.97   | 151.14 |
|          | Bias (deg)        | -12.66 | -26.77   | 5.18   |
|          | NMB(%)            | -7.95  | -14.65   | 3.55   |
|          | NME(%)            | 34.68  | 27.75    | 36.30  |
|          | RMSE (deg)        | 102.58 | 105.95   | 95.15  |
|          | IOA               | 0.74   | 0.75     | 0.77   |

(b)

| Variable | Parameter         | Lukou  | Hongqiao | Liyang |
|----------|-------------------|--------|----------|--------|
| T2       | Average OBS (°C)  | 26.51  | 27.31    | 26.74  |
|          | Average SIM (°C)  | 25.20  | 25.28    | 25.22  |
|          | Bias (°C)         | -1.23  | -1.88    | -1.41  |
|          | NMB (%)           | -4.62  | -6.90    | -5.26  |
|          | NME (%)           | 6.02   | 8.13     | 6.52   |
|          | RMSE (°C)         | 1.97   | 2.72     | 2.19   |
|          | IOA               | 0.92   | 0.89     | 0.92   |
| RH2      | Average OBS (%)   | 83.92  | 77.01    | 79.34  |
|          | Average SIM (%)   | 86.57  | 85.49    | 85.50  |
|          | Bias (%)          | 2.34   | 7.78     | 5.63   |
|          | NMB (%)           | 2.79   | 10.10    | 7.10   |
|          | NME (%)           | 7.01   | 14.05    | 9.55   |
|          | RMSE (%)          | 8.04   | 13.28    | 9.64   |
|          | IOA               | 0.90   | 0.77     | 0.86   |
| WS10     | Average OBS (m/s) | 2.76   | 3.91     | 1.97   |
|          | Average SIM (m/s) | 2.89   | 3.24     | 2.95   |
|          | Bias (m/s)        | 0.13   | -0.62    | 0.97   |
|          | NMB (%)           | 4.58   | -15.88   | 49.50  |
|          | NME (%)           | 38.09  | 28.71    | 64.82  |
|          | RMSE (m/s)        | 1.34   | 1.42     | 1.65   |
|          | IOA               | 0.76   | 0.88     | 0.65   |
| WD10     | Average OBS (deg) | 144.66 | 143.00   | 142.43 |
|          | Average SIM (deg) | 131.51 | 127.30   | 134.01 |
|          | Bias (deg)        | -12.67 | -15.50   | -8.36  |
|          | NMB(%)            | -8.76  | -10.86   | -5.87  |
|          | NME(%)            | 27.75  | 27.22    | 28.38  |
|          | RMSE (deg)        | 73.74  | 77.58    | 74.94  |
|          | IOA               | 0.79   | 0.76     | 0.79   |

(c)

| Variable | Parameter         | Lukou  | Hongqiao | Liyang |
|----------|-------------------|--------|----------|--------|
| T2       | Average OBS (°C)  | 17.97  | 20.13    | 18.46  |
|          | Average SIM (°C)  | 18.69  | 18.72    | 18.80  |
|          | Bias (°C)         | 0.70   | -1.42    | 0.32   |
|          | NMB (%)           | 3.87   | -7.03    | 1.72   |
|          | NME (%)           | 7.52   | 8.25     | 5.76   |
|          | RMSE (°C)         | 1.72   | 2.10     | 1.36   |
|          | IOA               | 0.95   | 0.90     | 0.96   |
| RH2      | Average OBS (%)   | 77.67  | 68.84    | 75.70  |
|          | Average SIM (%)   | 67.74  | 76.94    | 70.72  |
|          | Bias (%)          | -9.58  | 8.00     | -4.62  |
|          | NMB (%)           | -12.34 | 11.62    | -6.10  |
|          | NME (%)           | 16.85  | 14.97    | 12.52  |
|          | RMSE (%)          | 18.35  | 12.71    | 13.53  |
|          | IOA               | 0.82   | 0.87     | 0.88   |
| WS10     | Average OBS (m/s) | 2.43   | 3.24     | 1.81   |
|          | Average SIM (m/s) | 2.92   | 2.84     | 3.11   |
|          | Bias (m/s)        | 0.51   | -0.37    | 1.27   |
|          | NMB (%)           | 20.98  | -11.31   | 70.27  |
|          | NME (%)           | 44.50  | 34.11    | 82.49  |
|          | RMSE (m/s)        | 1.40   | 1.44     | 1.90   |
|          | IOA               | 0.74   | 0.74     | 0.55   |
| WD10     | Average OBS (deg) | 149.11 | 152.48   | 131.42 |
|          | Average SIM (deg) | 134.04 | 134.22   | 138.19 |
|          | Bias (deg)        | -15.43 | -14.32   | 8.64   |
|          | NMB(%)            | -10.34 | -9.39    | 6.58   |
|          | NME(%)            | 30.36  | 27.30    | 28.26  |
|          | RMSE (deg)        | 83.86  | 80.38    | 63.01  |
|          | IOA               | 0.80   | 0.83     | 0.85   |

(d)

Note: OBS and SIM indicated the results from observation and simulation, respectively. The Bias, NMB, NME, RMSE and IOA were calculated using following equations (P and O indicated the results from modeling prediction and observation, respectively):

$$Bias = \frac{1}{n} \sum_{i=1}^n (P_i - O_i);$$

$$NMB = \frac{\sum_{i=1}^n (P_i - O_i)}{\sum_{i=1}^n O_i} \times 100\% ;$$

$$NME = \frac{\sum_{i=1}^n |P_i - O_i|}{\sum_{i=1}^n O_i} \times 100\% ;$$

$$RMSE = \sqrt{\frac{1}{n} \sum_{i=1}^n (P_i - O_i)^2} ;$$

$$IOA = 1 - \frac{\sum_{i=1}^n (P_i - O_i)^2}{\sum_{i=1}^n (|P_i - \bar{O}| + |O_i - \bar{O}|)^2}$$

**Table S5. The monthly and annual contributions of industry, power generation, residential resources and transportation to ambient BC concentrations at NJU and PAES (unit: %).**

| Period  | Site | Industry (%) | Power generation (%) | Residential resources (%) | Transportation (%) | Sum (%) |
|---------|------|--------------|----------------------|---------------------------|--------------------|---------|
| January | NJU  | 11.48        | 0.53                 | 11.72                     | 11.27              | 35.00   |
|         | PAES | 12.78        | 0.25                 | 13.17                     | 13.31              | 39.51   |
| April   | NJU  | 25.22        | 0.53                 | 16.97                     | 21.33              | 64.05   |
|         | PAES | 25.26        | 0.21                 | 19.54                     | 24.23              | 69.24   |
| July    | NJU  | 29.73        | 0.62                 | 20.16                     | 32.27              | 82.78   |
|         | PAES | 27.05        | 0.35                 | 23.61                     | 35.43              | 86.44   |
| October | NJU  | 24.31        | 0.99                 | 13.55                     | 19.96              | 58.81   |
|         | PAES | 23.58        | 0.57                 | 16.14                     | 23.32              | 63.61   |
| Annual  | NJU  | 21.01        | 0.68                 | 14.71                     | 19.21              | 55.61   |
|         | PAES | 21.91        | 0.34                 | 17.84                     | 23.53              | 63.62   |

**Table S6. Statistical indicators for observed and simulated BC concentrations using JS-prior and JS-posterior in January excluding data from 16<sup>th</sup> to 26<sup>th</sup> at PAES.**

| Site | Parameter                                | JS-prior | JS-posterior |
|------|------------------------------------------|----------|--------------|
| PAES | Average SIM ( $\mu\text{g}/\text{m}^3$ ) | 2.86     | 2.68         |
|      | Average OBS ( $\mu\text{g}/\text{m}^3$ ) | 2.15     | 2.15         |
|      | NMB (%)                                  | 32.95    | 24.65        |
|      | NME (%)                                  | 52.61    | 49.63        |
|      | R                                        | 0.72     | 0.74         |

**Table S7. The simulated monthly average PBL heights and the range of hourly simulations at NJU and PAES in four months (unit: m).**

| Month   | Site | Monthly average PBL (m) | Hourly average PBL (m) |
|---------|------|-------------------------|------------------------|
| January | NJU  | 370.25                  | 27.59-1443.64          |
|         | PAES | 384.56                  | 27.20-1460.07          |
| April   | NJU  | 432.73                  | 28.61-2157.87          |
|         | PAES | 441.72                  | 28.61-2157.87          |
| July    | NJU  | 381.14                  | 30.70-1617.69          |
|         | PAES | 431.02                  | 30.02-1975.01          |
| October | NJU  | 462.57                  | 29.70-2065.97          |
|         | PAES | 488.30                  | 29.78-2073.46          |

**Table S8. Statistical indicators for observed and simulated BC concentrations for all periods, those included in the multiple regression model, and those excluded from the model in JS-prior and Case 2 for April 2015 at NJU.**

| Site | Parameter                                | JS-prior:<br>All period | JS-prior:<br>Included | JS-prior:<br>Excluded | Case 2:<br>All period | Case 2:<br>Included | Case 2:<br>Excluded |
|------|------------------------------------------|-------------------------|-----------------------|-----------------------|-----------------------|---------------------|---------------------|
| NJU  | Average SIM ( $\mu\text{g}/\text{m}^3$ ) | 2.38                    | 2.71                  | 2.08                  | 2.27                  | 2.42                | 2.08                |
|      | Average OBS ( $\mu\text{g}/\text{m}^3$ ) | 2.69                    | 2.56                  | 2.99                  | 2.69                  | 2.56                | 2.99                |
|      | NMB (%)                                  | -16.02                  | 5.90                  | -56.48                | -21.59                | -5.32               | -56.63              |
|      | NME (%)                                  | 42.31                   | 34.01                 | 57.62                 | 32.47                 | 21.09               | 57.61               |



**Table S9. BC emissions from Nanjing and Suzhou–Wuxi–Changzhou-Zhenjiang city cluster in different cases in April 2015 (unit: Gg).**

| Case       | Sector         | Nanjing | Suzhou–Wuxi–Changzhou<br>-Zhenjiang | Southern<br>Jiangsu |
|------------|----------------|---------|-------------------------------------|---------------------|
| Scenario B | Power          | 0       | 0.01                                | 0.01                |
|            | Industry       | 0.21    | 1.13                                | 1.34                |
|            | Residential    | 0.08    | 0.24                                | 0.32                |
|            | Transportation | 0.12    | 0.30                                | 0.42                |
|            | Total          | 0.41    | 1.68                                | 2.09                |
| Case 1     | Power          | 0       | 0.01                                | 0.01                |
|            | Industry       | 0.05    | 0.25                                | 0.30                |
|            | Residential    | 0.04    | 0.14                                | 0.19                |
|            | Transportation | 0.08    | 0.20                                | 0.28                |
|            | Total          | 0.17    | 0.60                                | 0.78                |
| Case 2     | Power          | 0       | 0.01                                | 0.01                |
|            | Industry       | 0.09    | 0.47                                | 0.56                |
|            | Residential    | 0.07    | 0.23                                | 0.30                |
|            | Transportation | 0.08    | 0.20                                | 0.27                |
|            | Total          | 0.24    | 0.91                                | 1.14                |
| Case 3     | Power          | 0       | 0.01                                | 0.01                |
|            | Industry       | 0.04    | 0.47                                | 0.51                |
|            | Residential    | 0.03    | 0.23                                | 0.26                |
|            | Transportation | 0.08    | 0.20                                | 0.27                |
|            | Total          | 0.15    | 0.90                                | 1.05                |

**Table S10. The monthly emissions, simulated wet depositions and the ratios of wet deposition to emissions at NJU (a), PAES (b) and southern Jiangsu (c) using JS-prior and JS-posterior, respectively.**

|                              | January  |              | April    |              | July     |              | October  |              |
|------------------------------|----------|--------------|----------|--------------|----------|--------------|----------|--------------|
|                              | JS-prior | JS-posterior | JS-prior | JS-posterior | JS-prior | JS-posterior | JS-prior | JS-posterior |
| Emission (kg)                | 410.84   | 383.01       | 379.81   | 225.56       | 417.61   | 203.25       | 368.48   | 347.25       |
| Wet deposition (kg)          | 100.97   | 93.81        | 172.97   | 169.79       | 254.33   | 194.64       | 91.62    | 85.88        |
| Wet deposition/emissions (%) | 24.58    | 24.49        | 45.54    | 75.27        | 60.90    | 95.77        | 24.86    | 24.73        |

(a)

|                              | January  |              | April    |              | July     |              | October  |              |
|------------------------------|----------|--------------|----------|--------------|----------|--------------|----------|--------------|
|                              | JS-prior | JS-posterior | JS-prior | JS-posterior | JS-prior | JS-posterior | JS-prior | JS-posterior |
| Emission (kg)                | 1221.70  | 1286.89      | 1145.83  | 698.33       | 1130.99  | 528.42       | 1103.29  | 1219.42      |
| Wet deposition (kg)          | 109.27   | 105.10       | 186.10   | 183.60       | 189.71   | 146.10       | 51.03    | 50.00        |
| Wet deposition/emissions (%) | 8.94     | 8.17         | 16.24    | 26.29        | 16.77    | 27.65        | 4.63     | 4.10         |

(b)

|                              | January  |              | April    |              | July     |              | October  |              |
|------------------------------|----------|--------------|----------|--------------|----------|--------------|----------|--------------|
|                              | JS-prior | JS-posterior | JS-prior | JS-posterior | JS-prior | JS-posterior | JS-prior | JS-posterior |
| Emission (Gg)                | 2.26     | 1.45         | 2.10     | 0.78         | 2.26     | 0.90         | 2.38     | 1.33         |
| Wet deposition (Gg)          | 0.54     | 0.48         | 0.59     | 0.53         | 0.71     | 0.58         | 0.41     | 0.37         |
| Wet deposition/emissions (%) | 24.06    | 33.36        | 27.96    | 67.58        | 31.26    | 64.26        | 17.24    | 27.85        |

(c)

Figures

Figure S1.

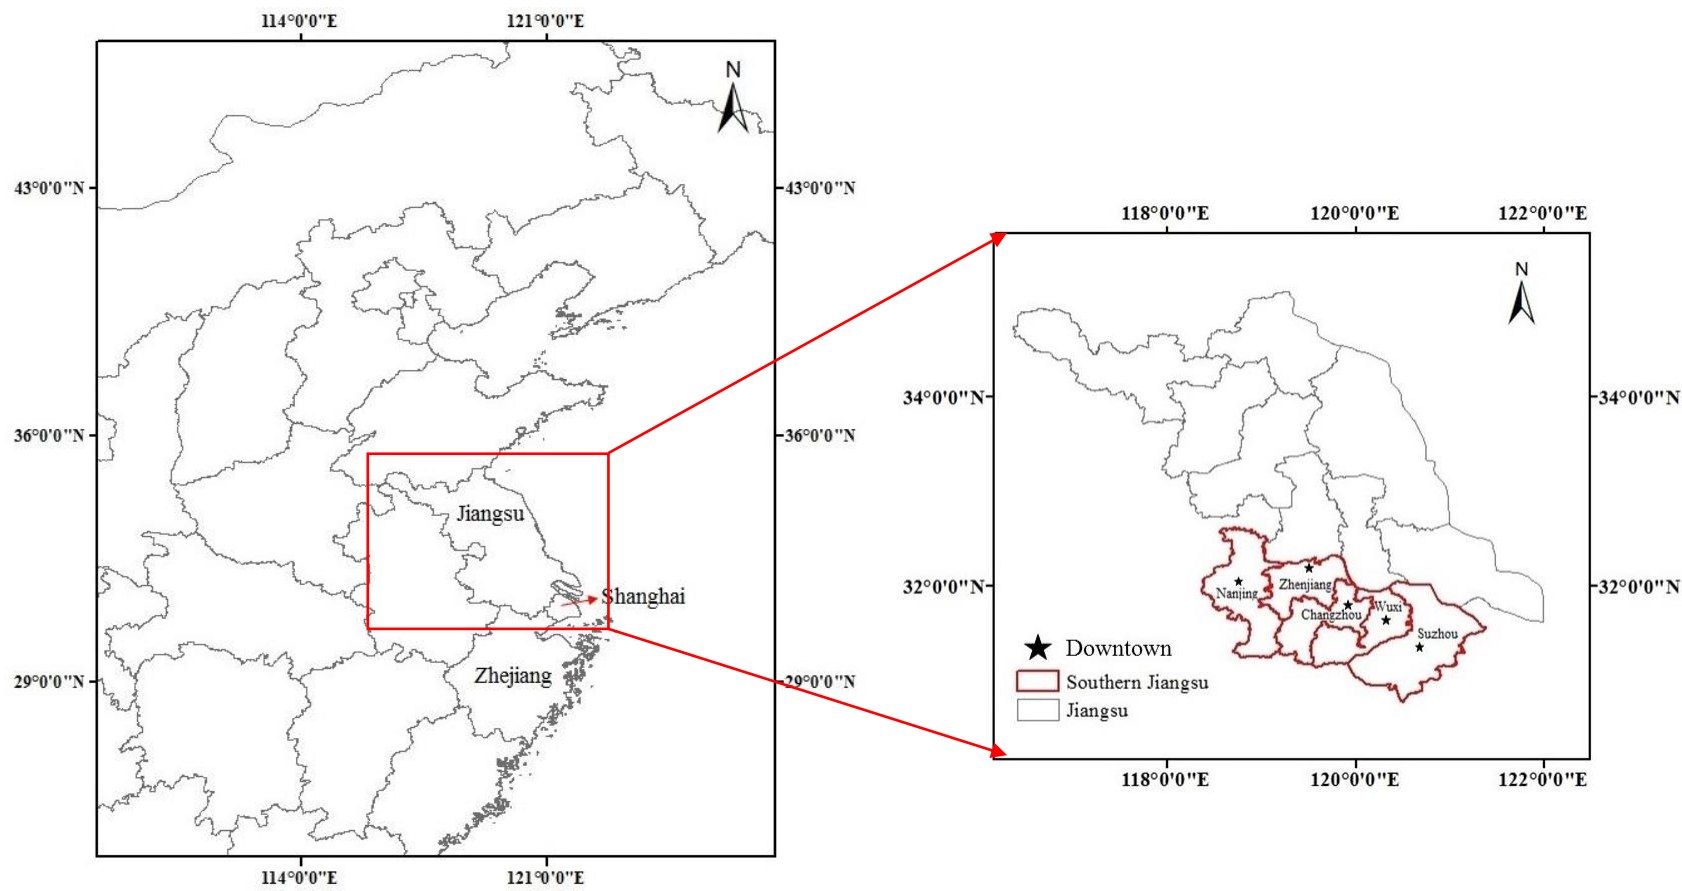

**Figure S2.**

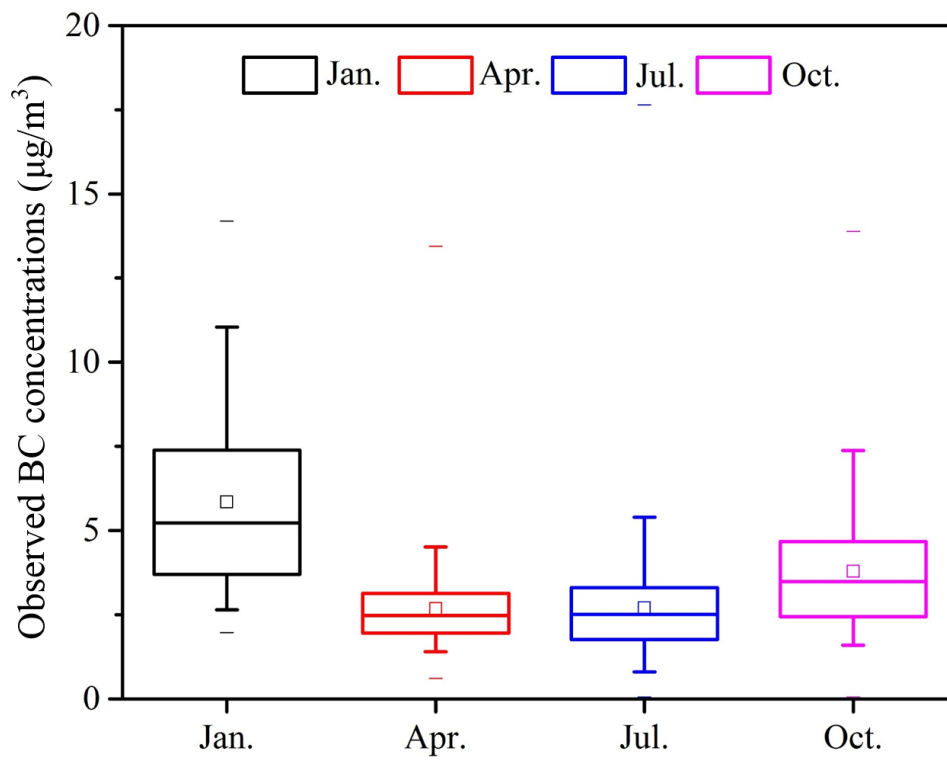

(a)

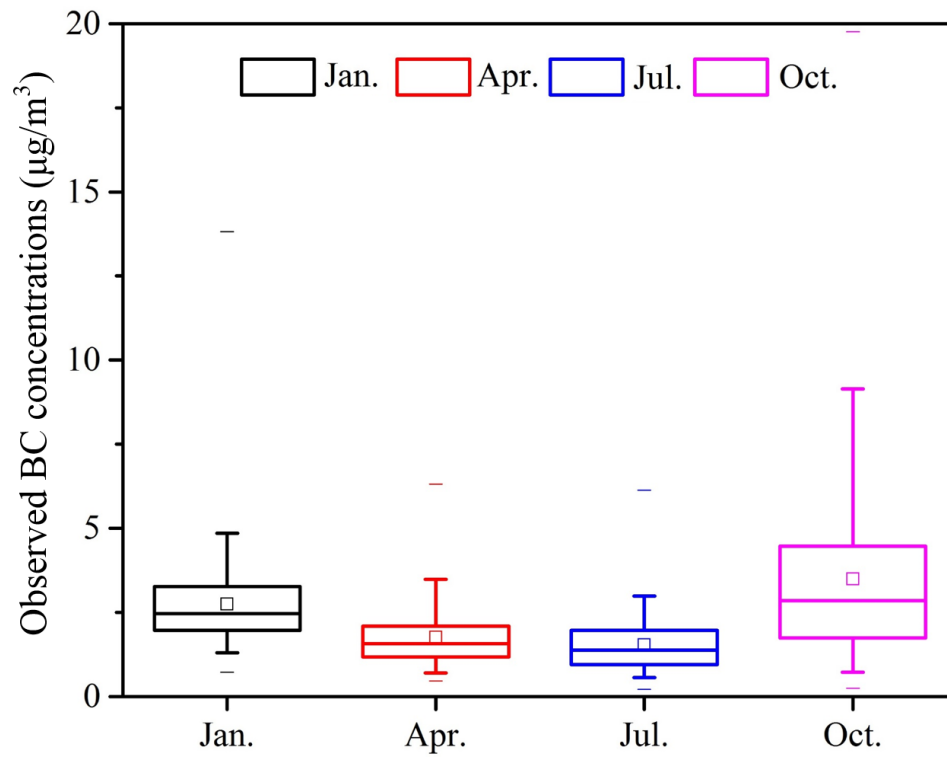

(b)

Figure S3.

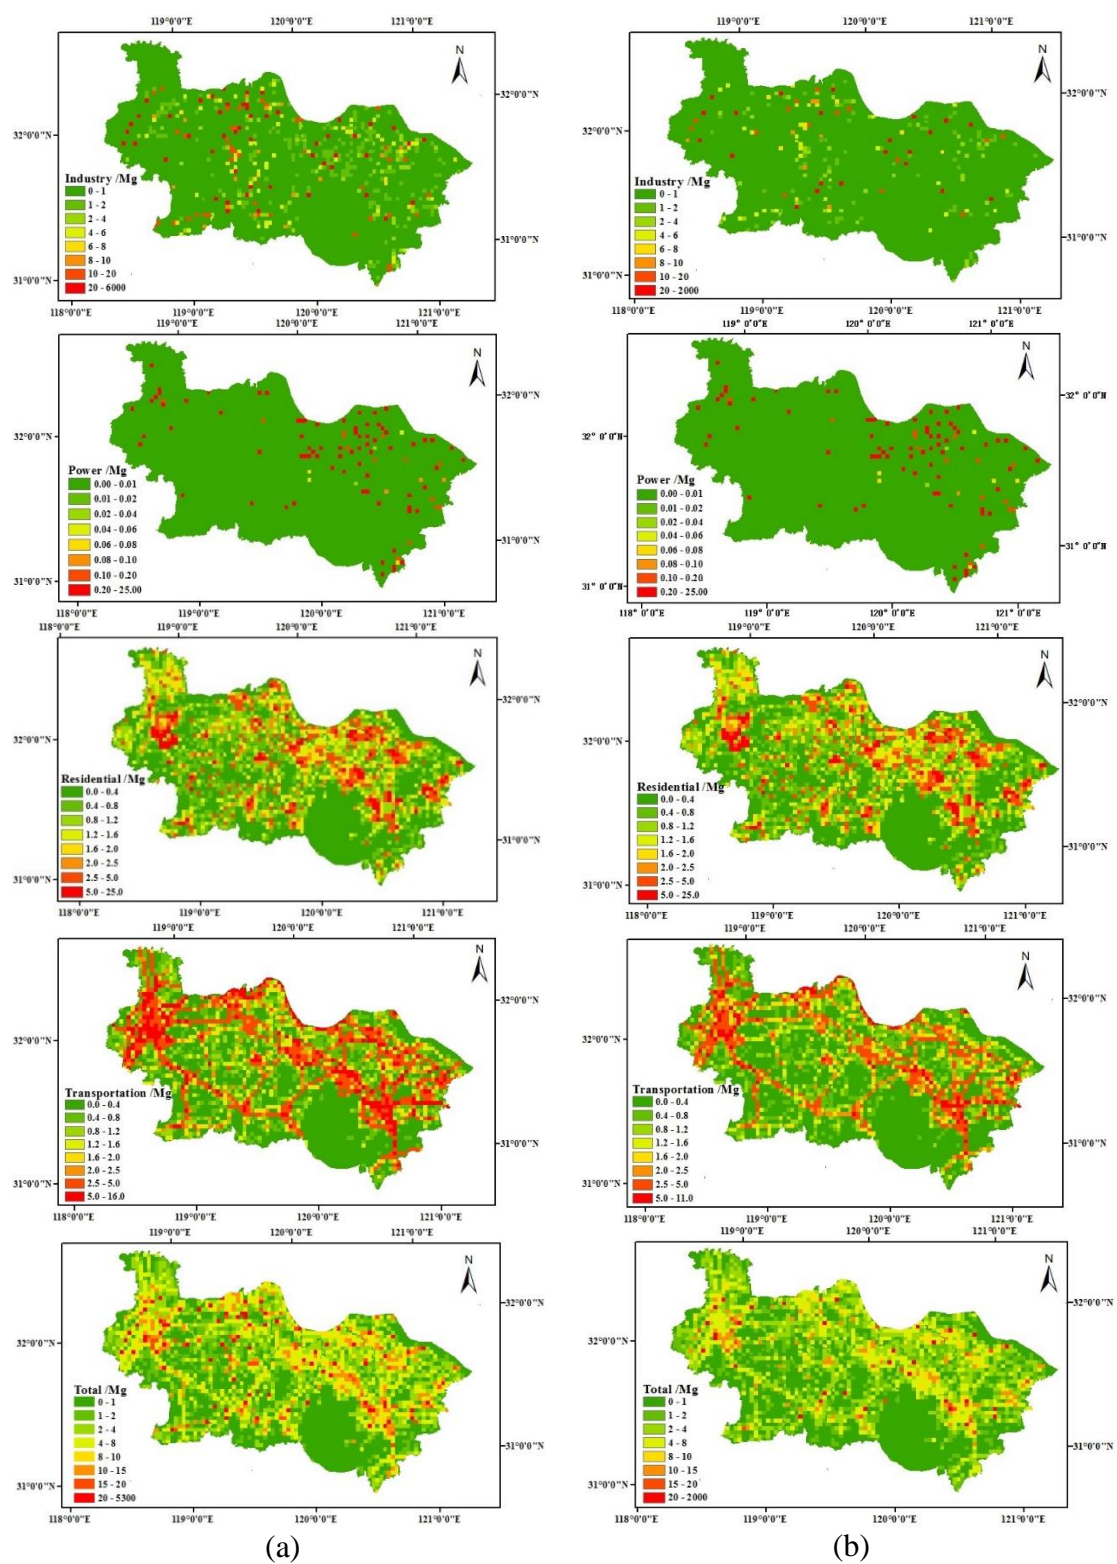

**Figure S4.**

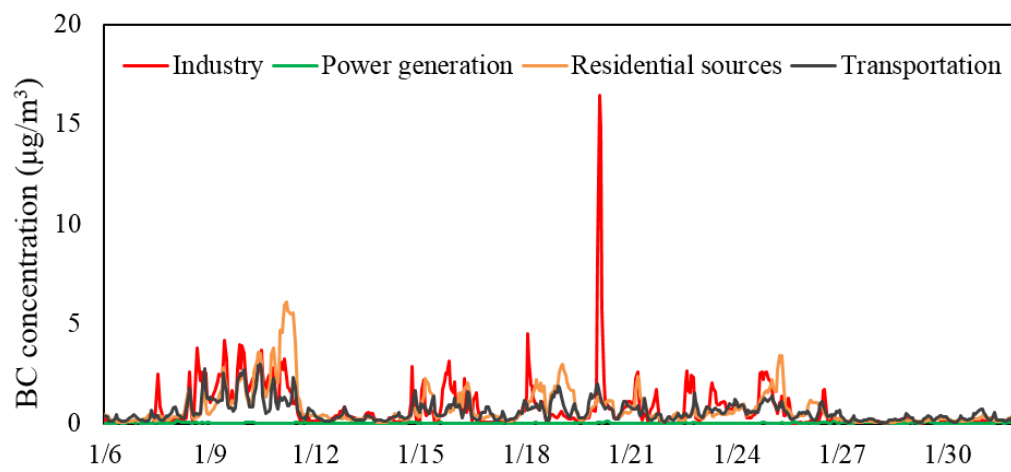

(a)

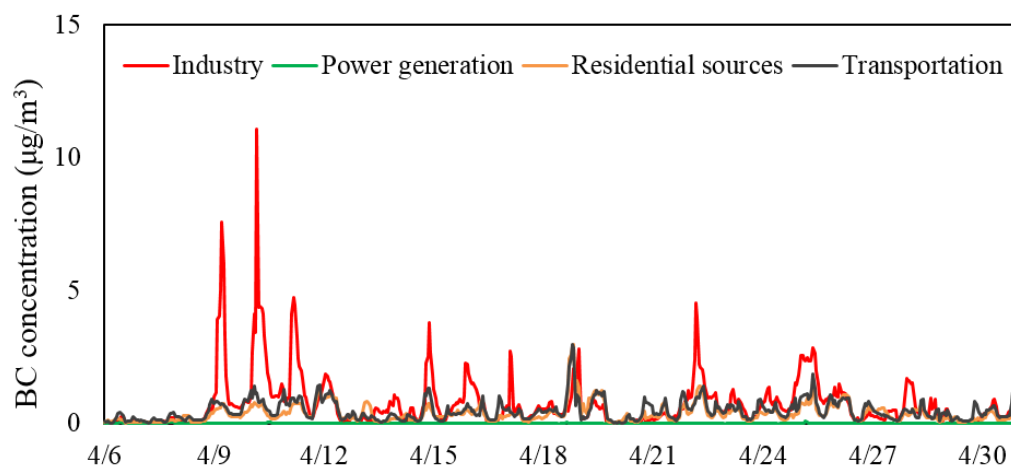

(b)

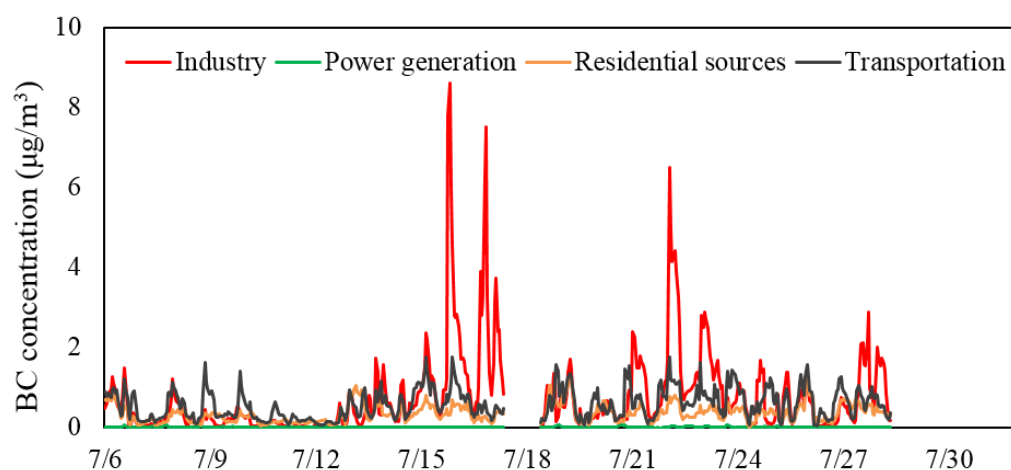

(c)

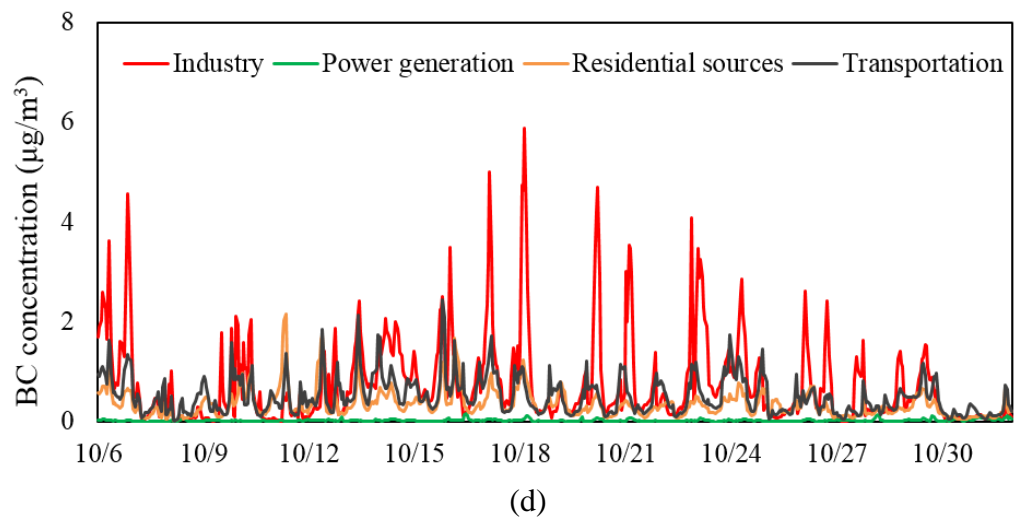

**Figure S5.**

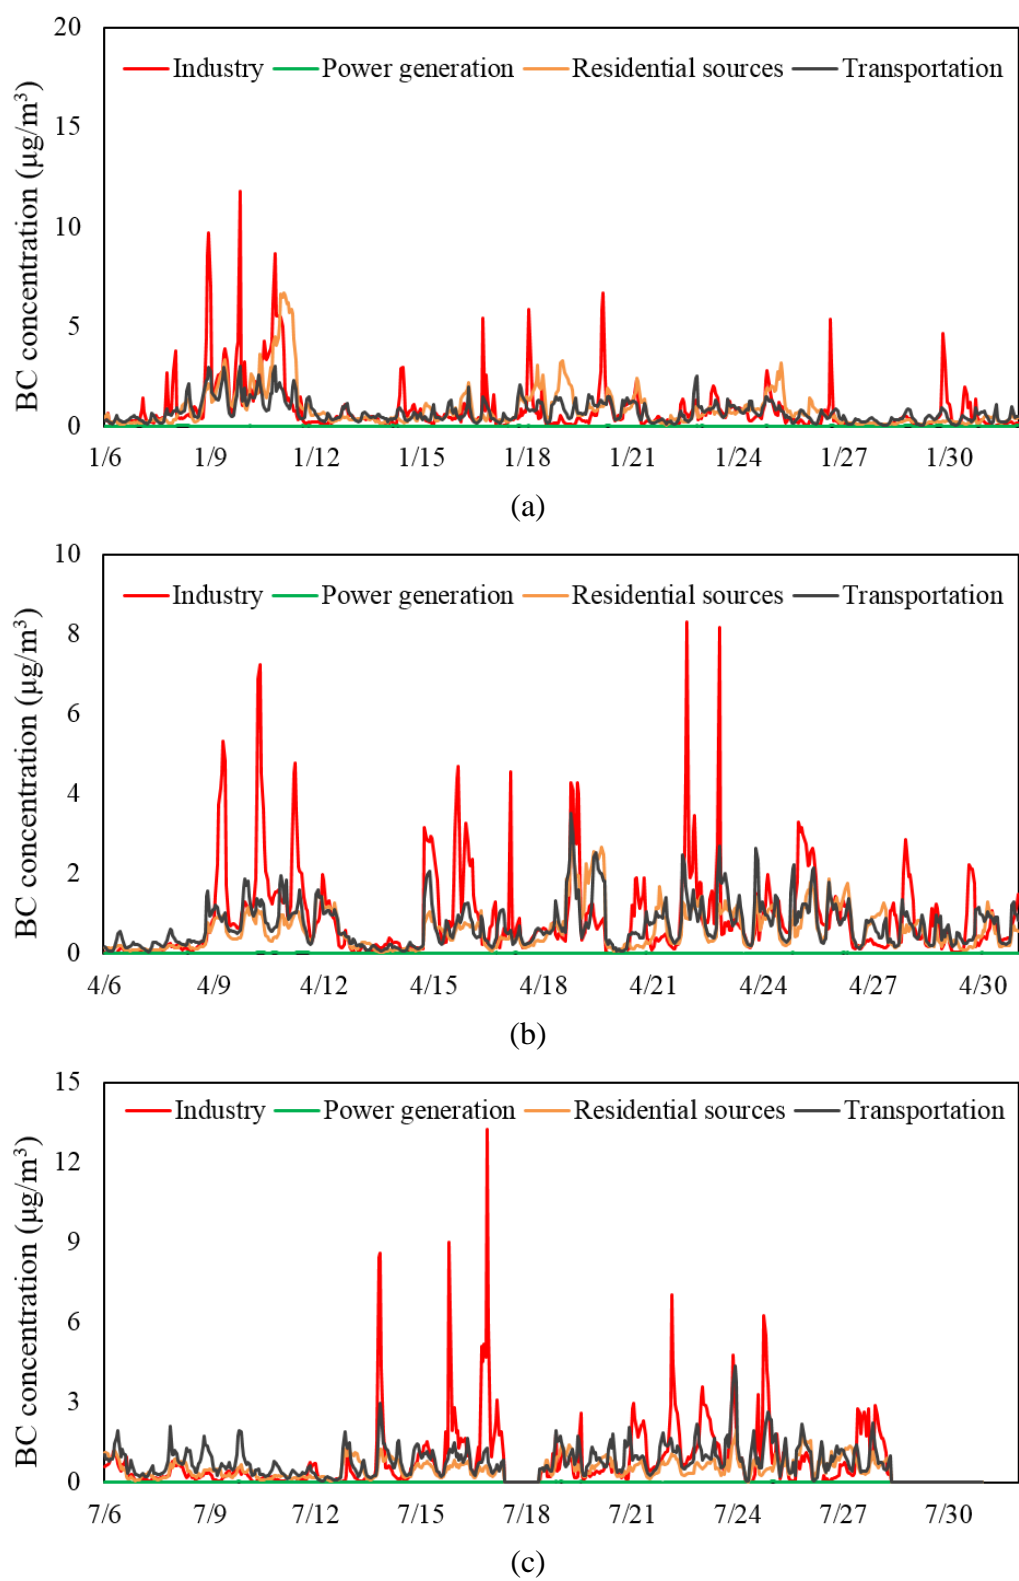



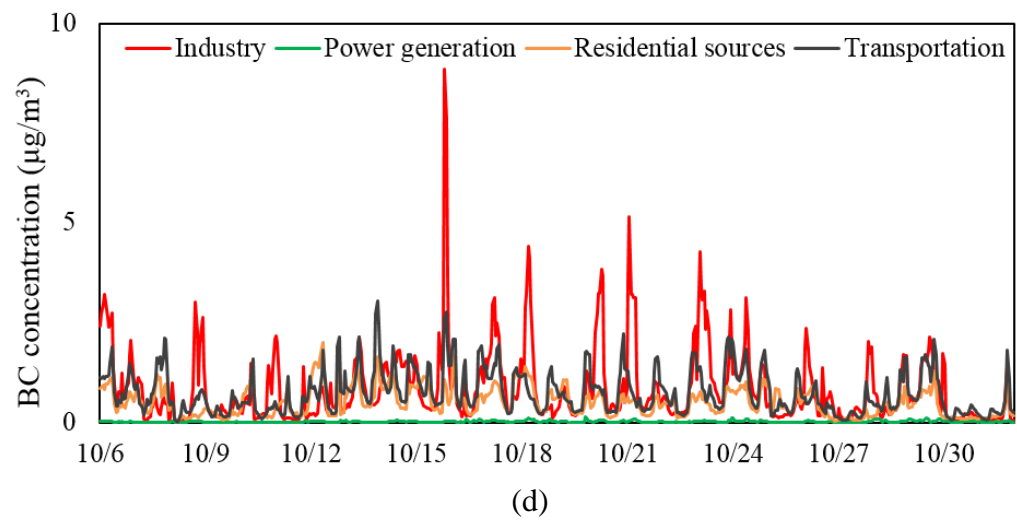

**Figure S6.**

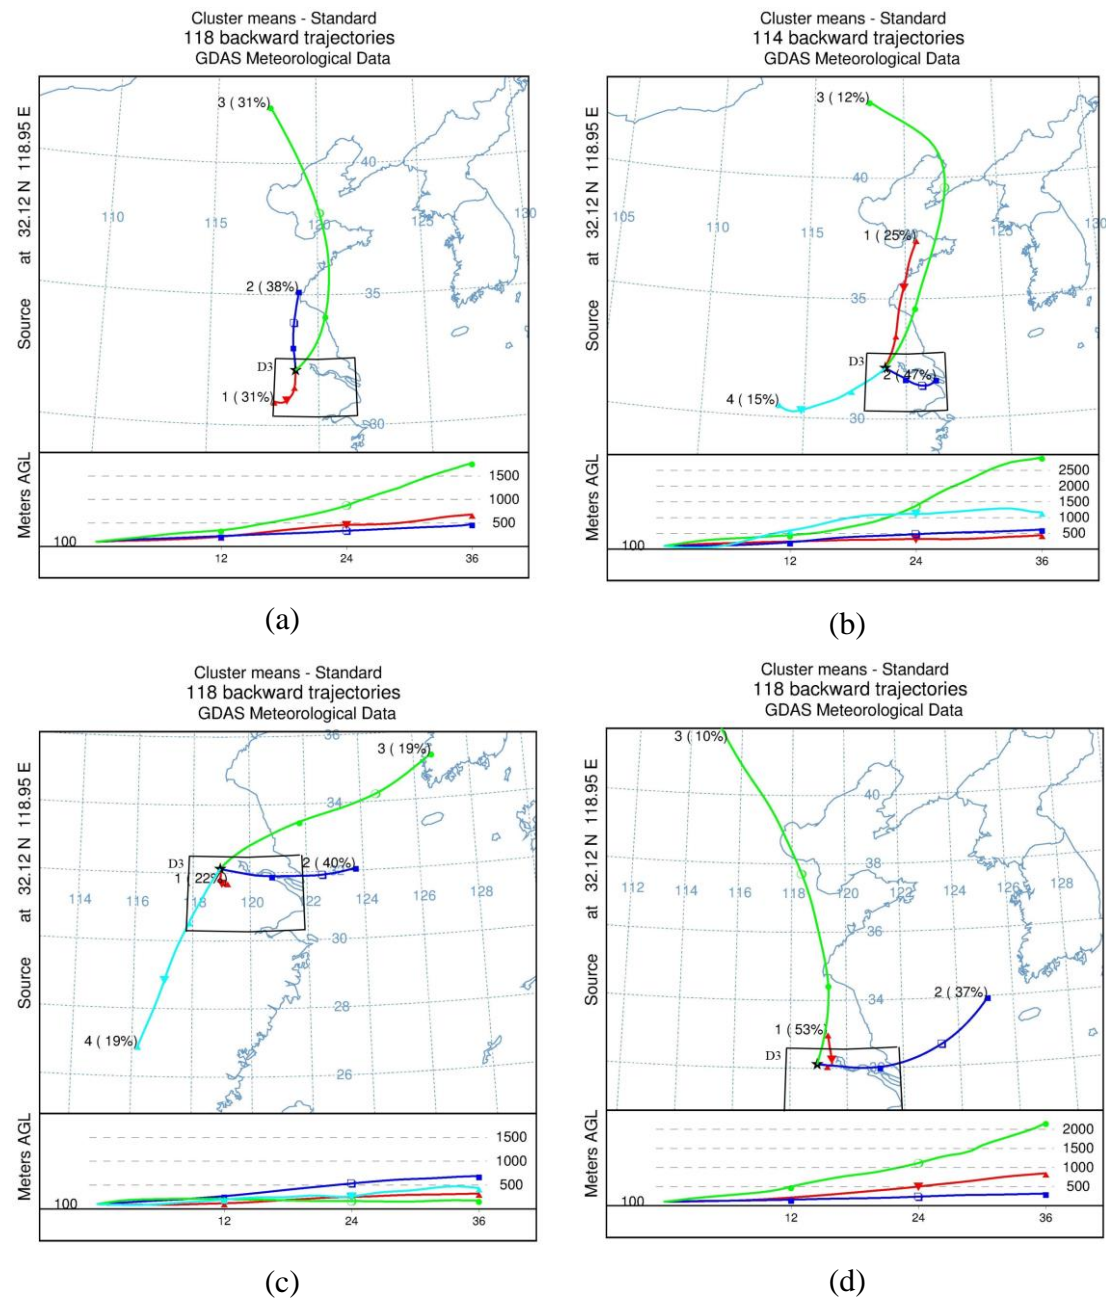

**Figure S7.**

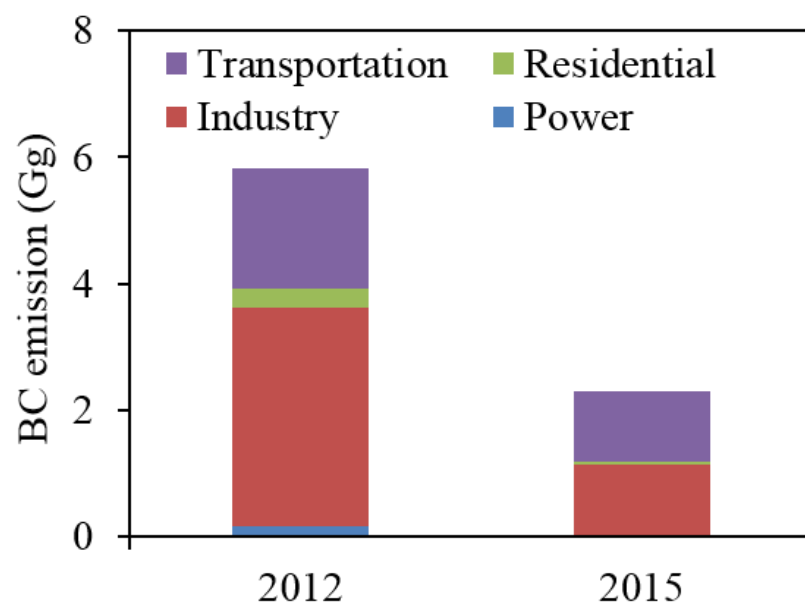

**Figure S8.**

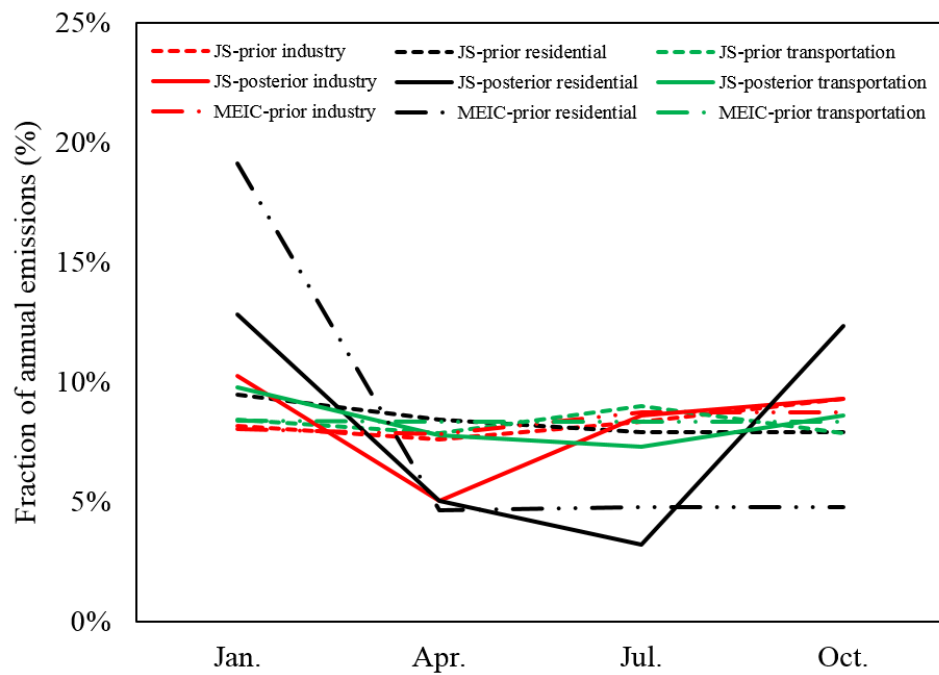

(a)

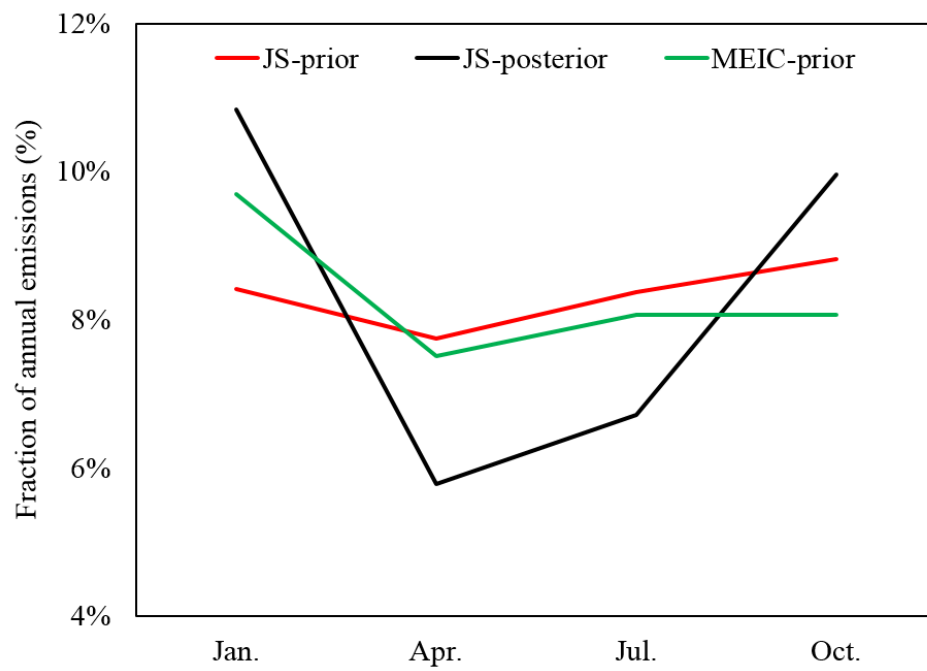

(b)

**Figure S9.**

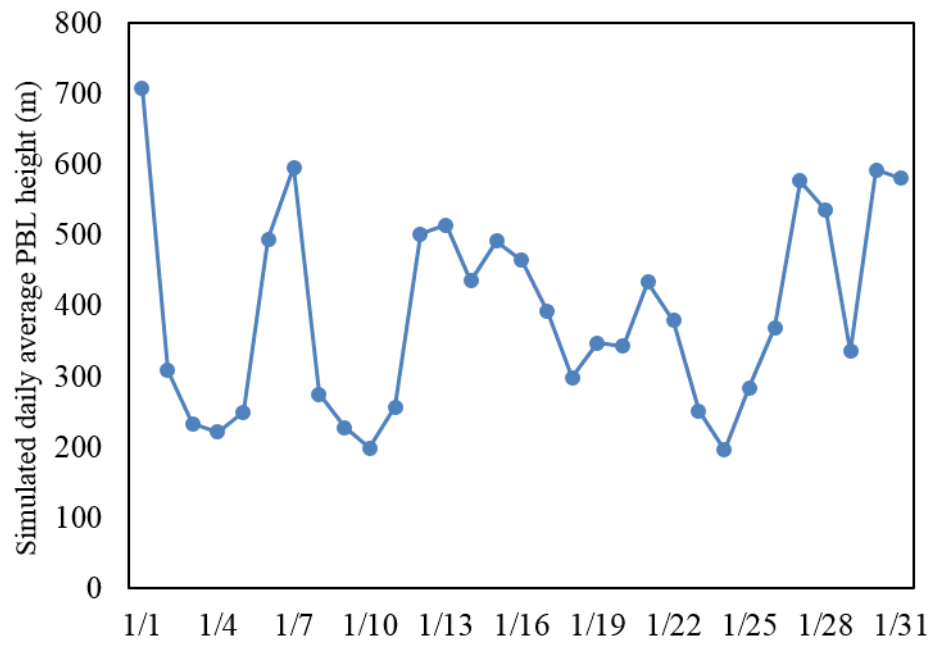

Figure S10.

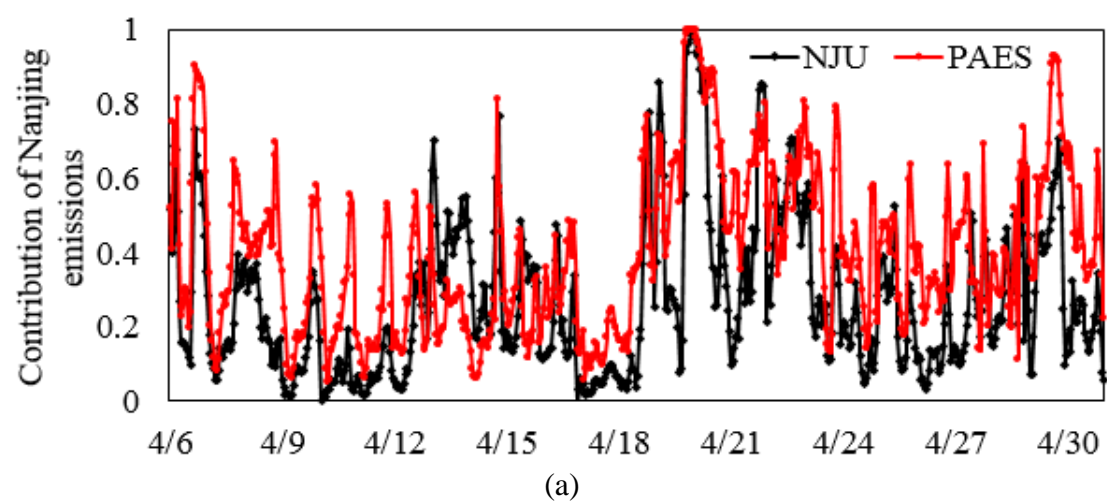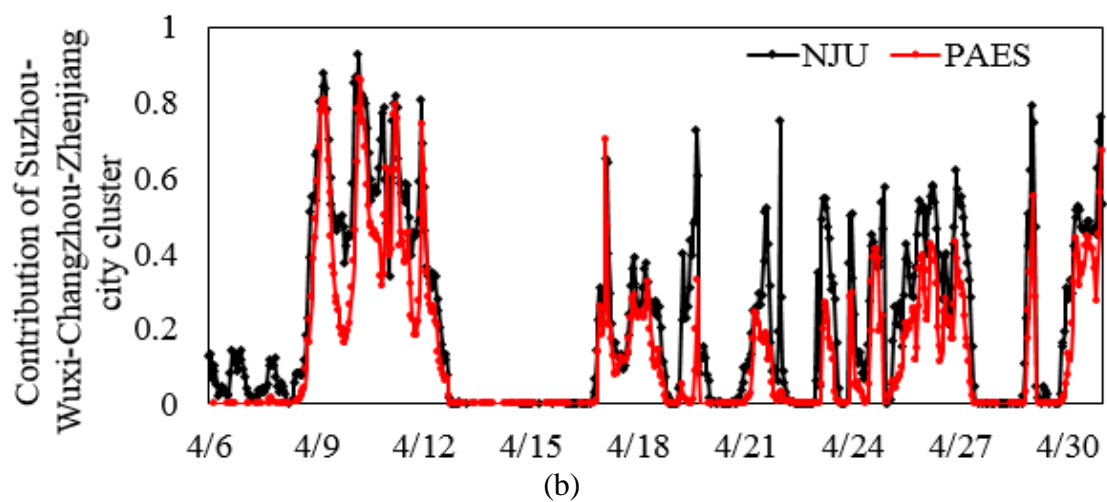

**Figure S11.**

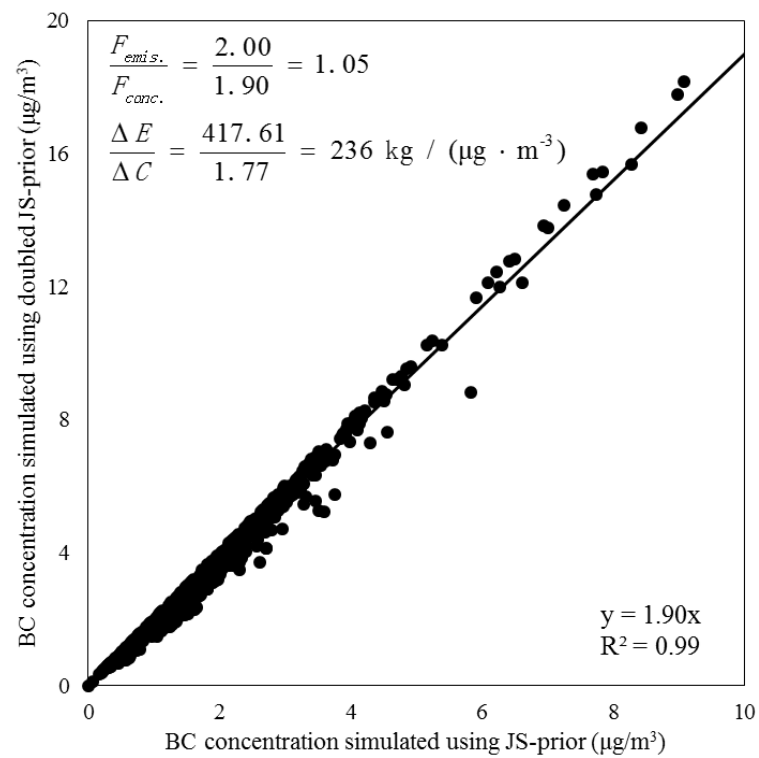

(a)

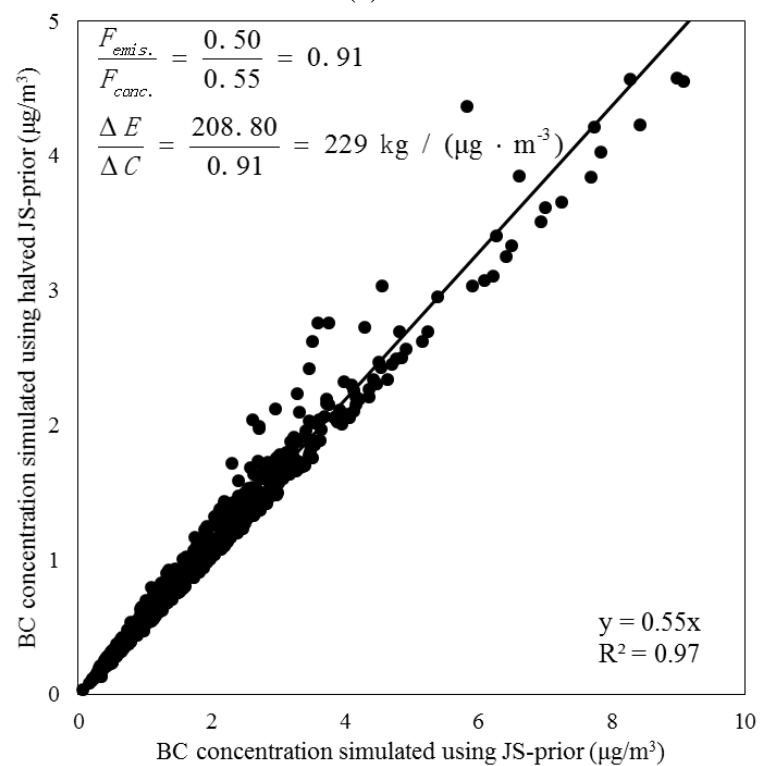

(b)

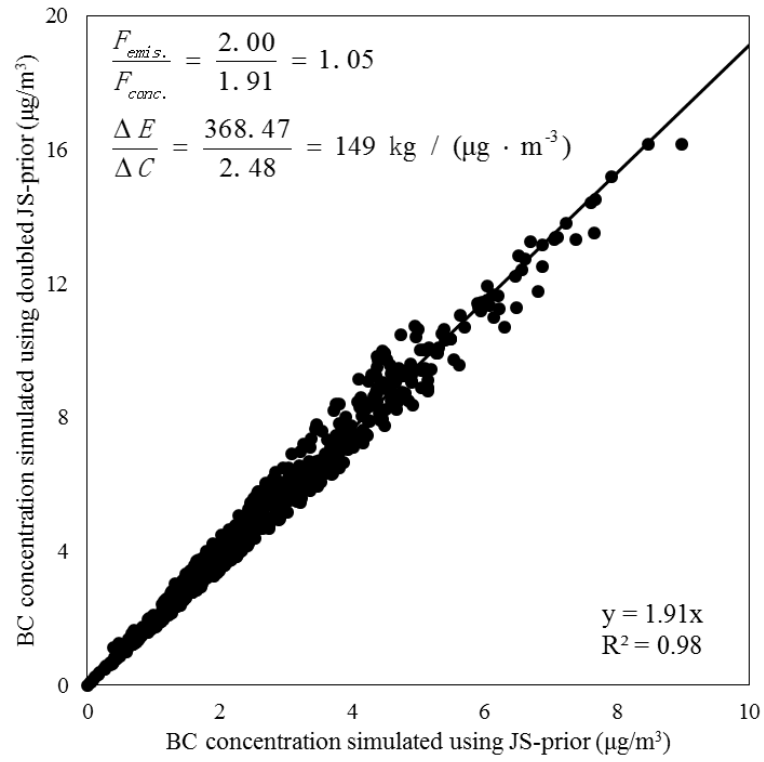

(c)

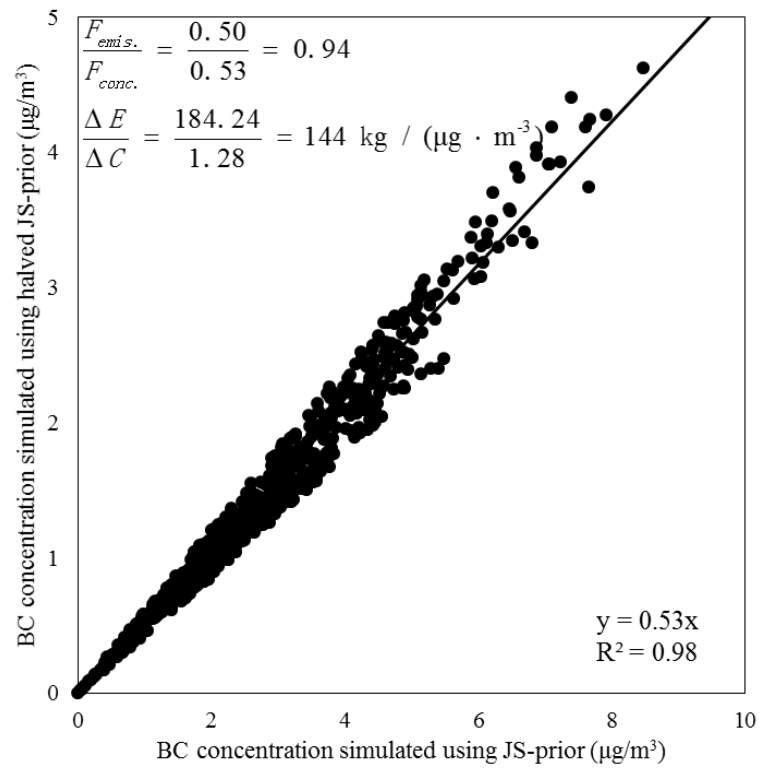

(d)



**Figure S12.**

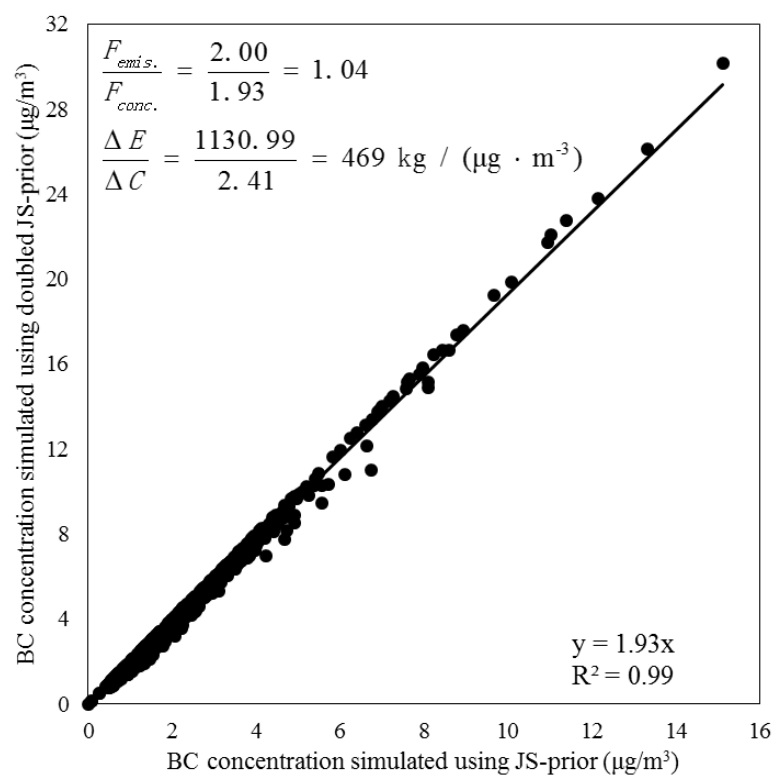

(a)

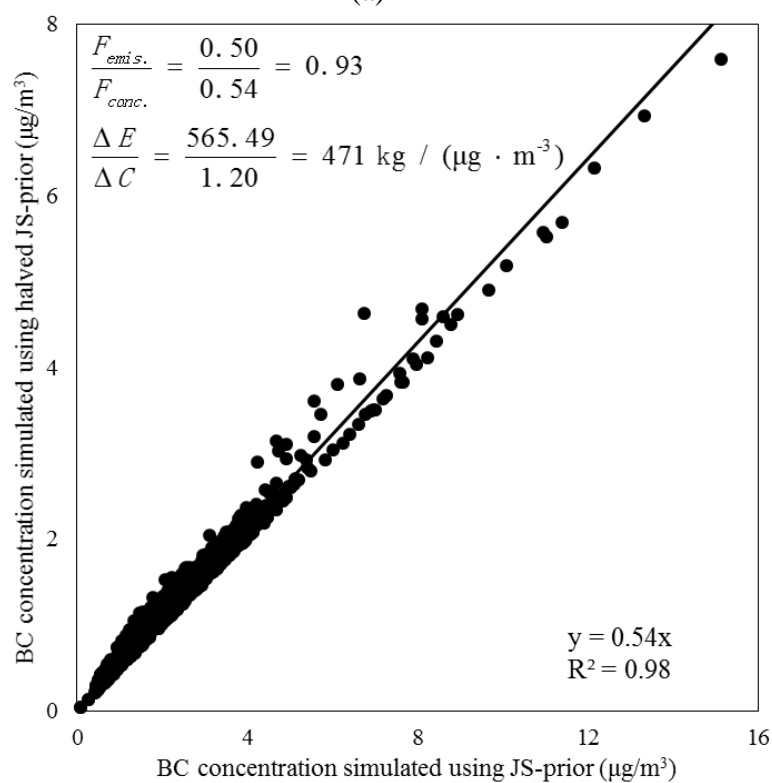

(b)

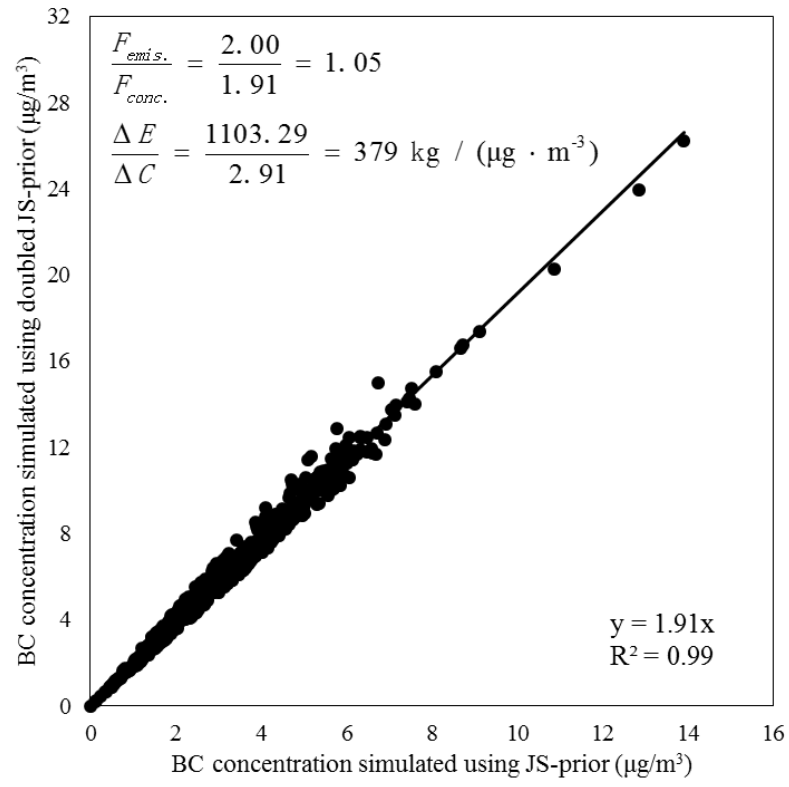

(c)

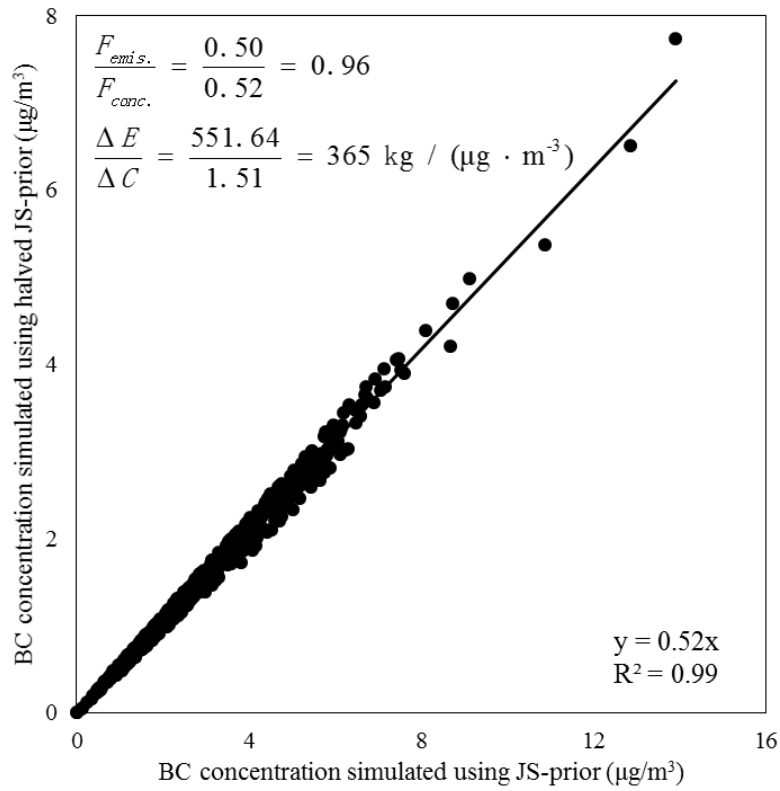

(d)

**Figure S13.**

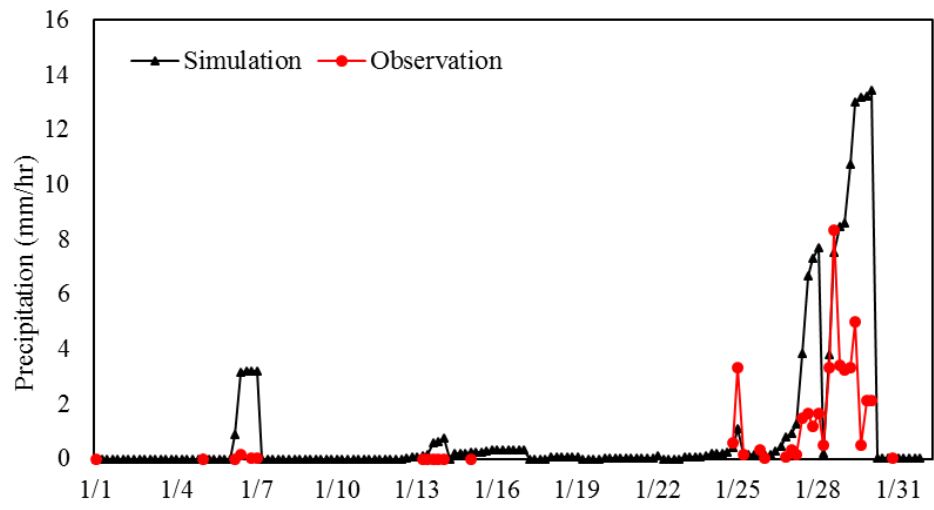

(a)

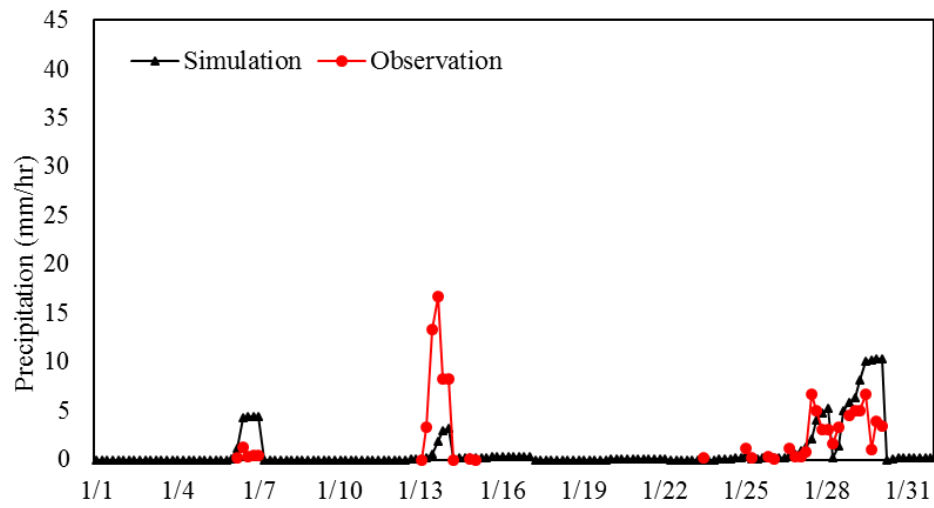

(b)

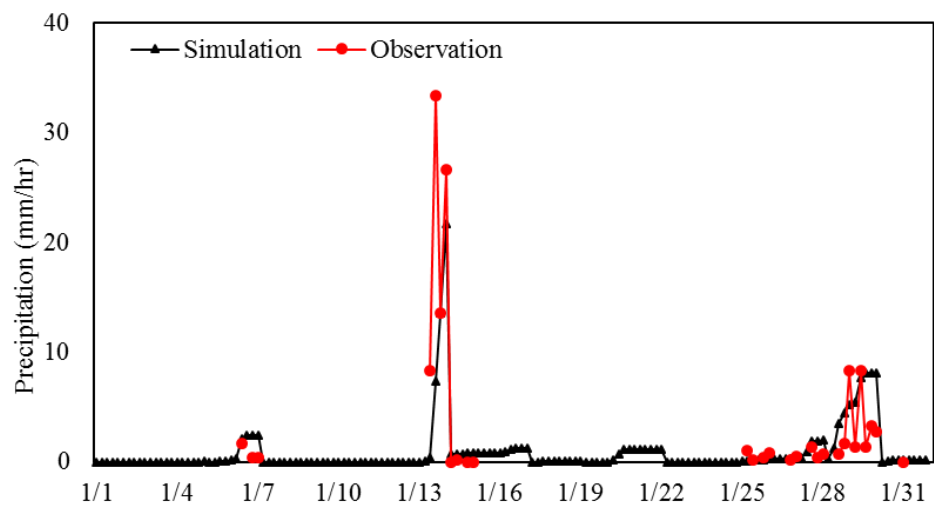

(c)

**Figure S14.**

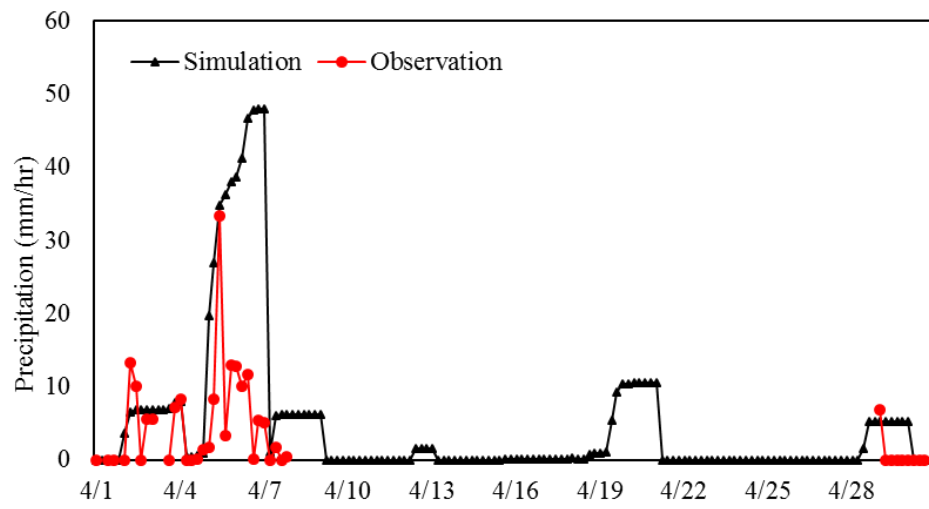

(a)

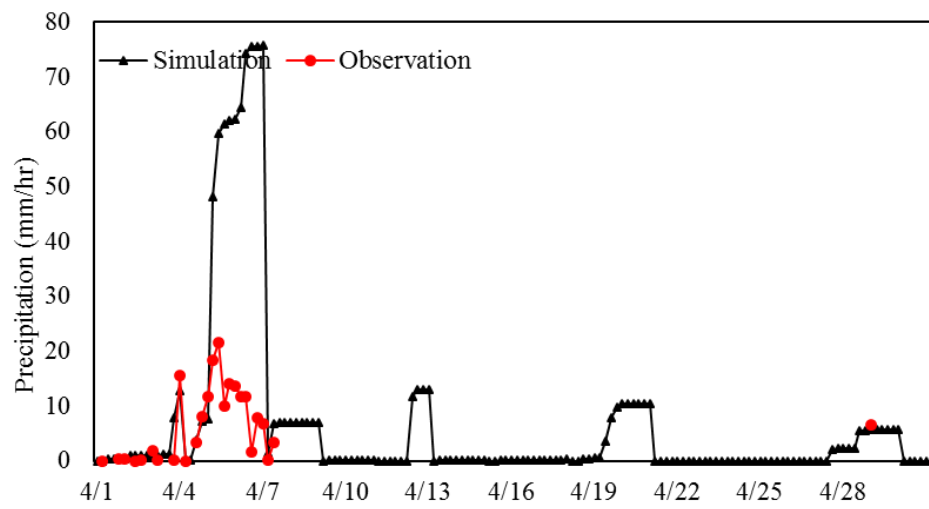

(b)

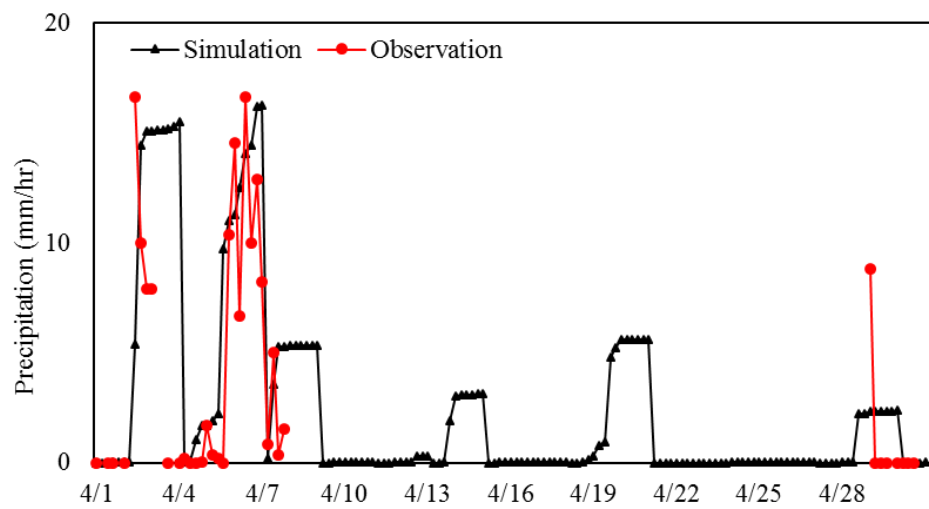

(c)

**Figure S15.**

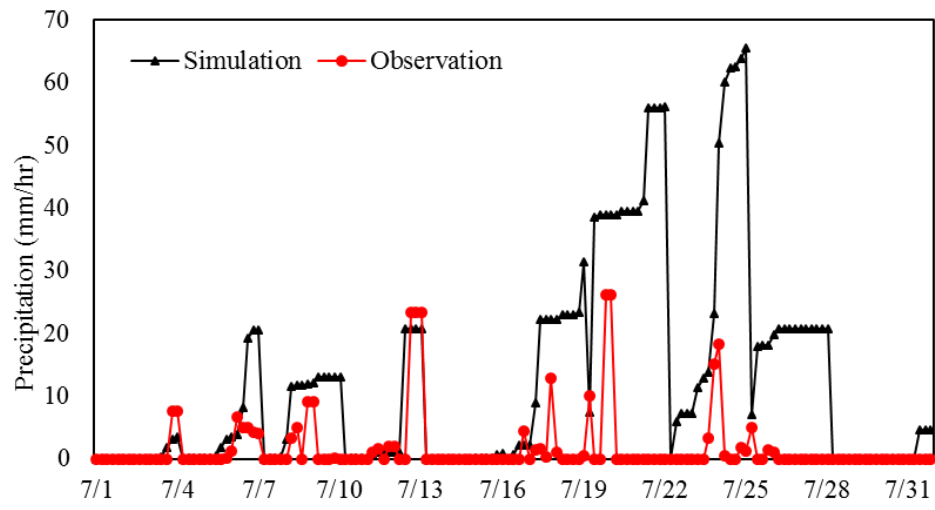

(a)

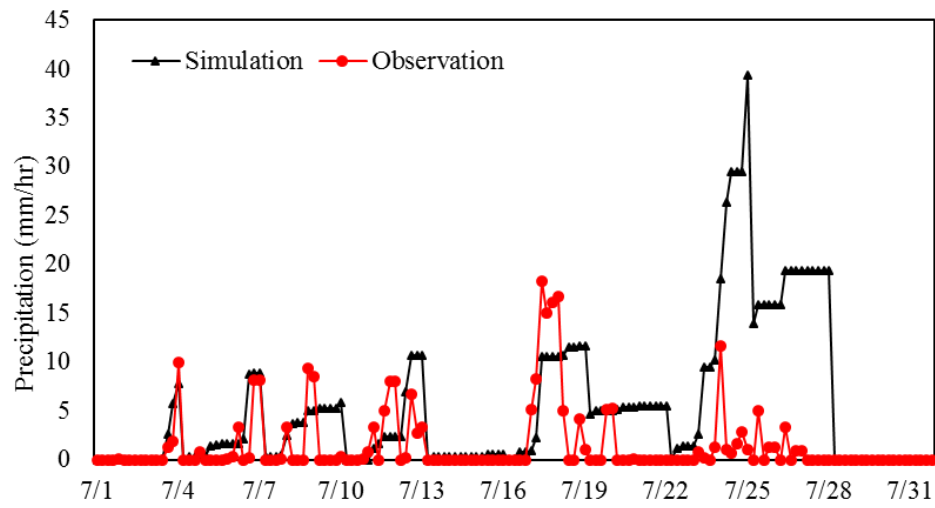

(b)

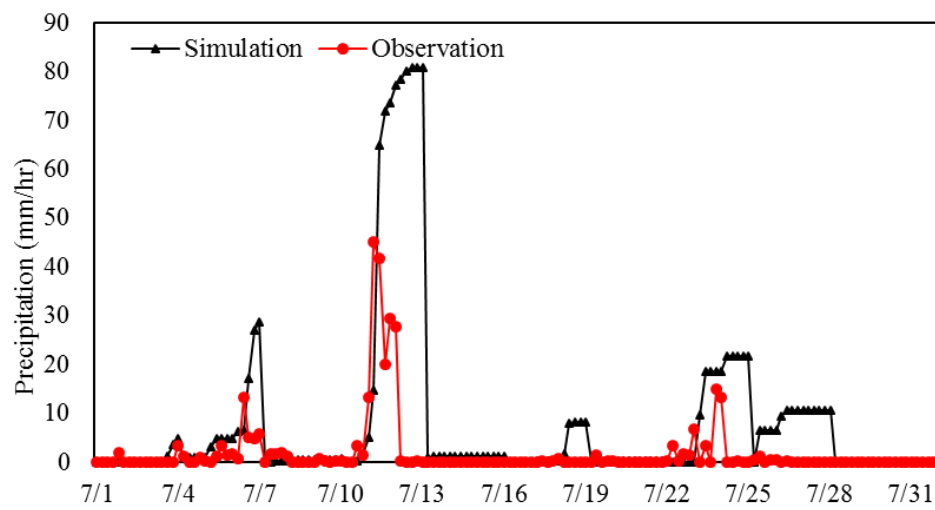

(c)

**Figure S16.**

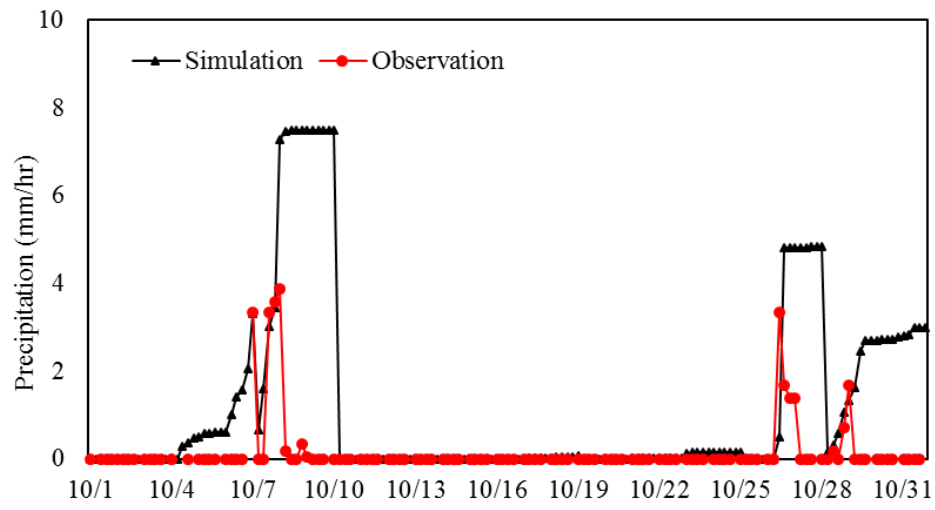

(a)

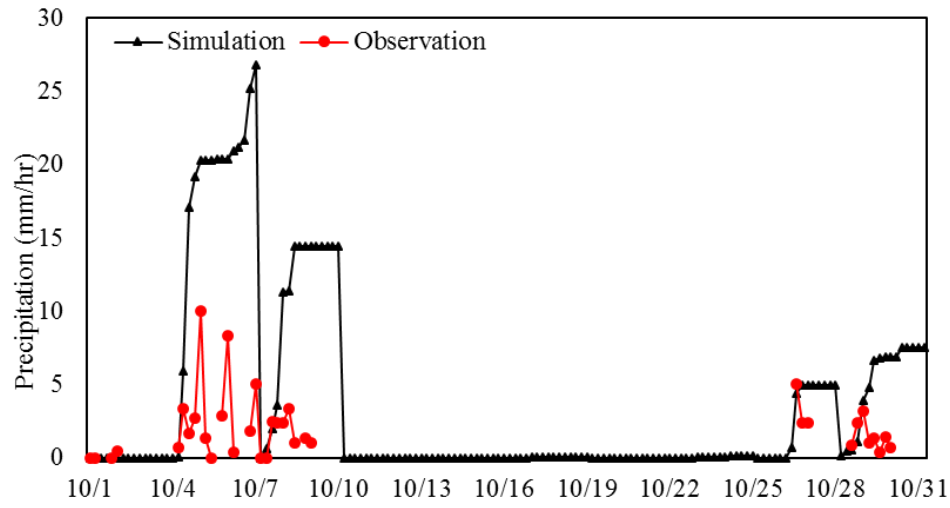

(b)

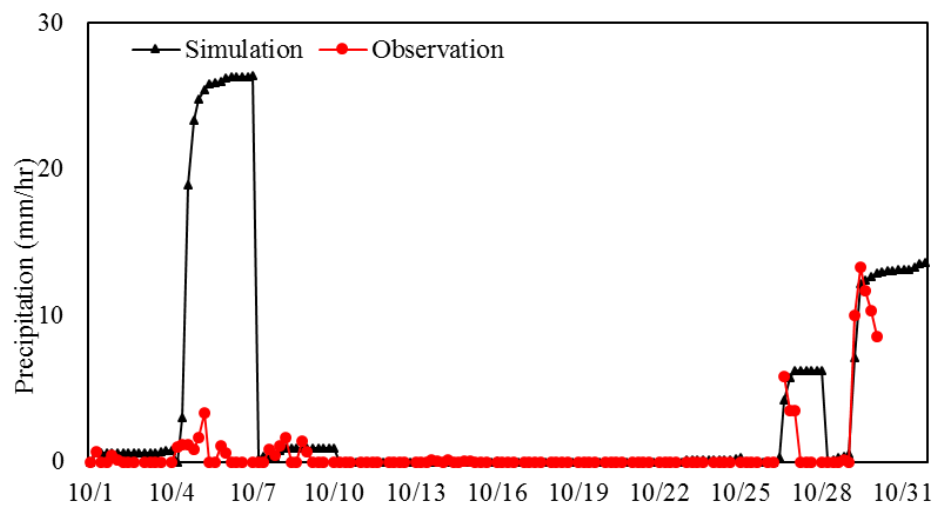

(c)
